# Supplementary material for: The Consequences of Technostress for End Users in Organizations: Conceptual Development and Empirical Validation
Source: Atypon-hosted journal article supplement (doi:10.1287/isre.1070.0165), 2008-08-21
Supplement: isre.1070.0165-sm-online_suppl.pdf [file isre.1070.0165-sm-online_suppl.pdf]

## Appendix (Online Supplement)

**Table 1: Exploratory Factor Analysis on Sample Set 1 (400 Cases)**  
**1a. Rotated Component Matrix – “Technostress Creators”**

|       | Component |      |      |      |      |      |
|-------|-----------|------|------|------|------|------|
|       | 1         | 2    | 3    | 4    | 5    | 6    |
| II_1  | .790      |      |      |      |      |      |
| II_2  | .834      |      |      |      |      |      |
| II_3  | .810      |      |      |      |      |      |
| II_4  | .617      |      |      |      |      |      |
| II_5  | .638      |      |      |      |      |      |
| II_8  |           | .718 |      |      |      |      |
| II_9  |           | .748 |      |      |      |      |
| II_10 |           | .815 |      |      |      |      |
| II_11 |           | .683 |      |      |      |      |
| II_12 |           |      | .661 |      |      |      |
| II_13 |           |      | .840 |      |      |      |
| II_14 |           |      | .632 |      |      |      |
| II_16 |           |      | .707 |      |      |      |
| II_17 |           |      |      | .579 |      |      |
| II_18 |           |      |      | .676 |      |      |
| II_19 |           |      |      | .772 |      |      |
| II_20 |           |      |      | .645 |      |      |
| II_21 |           |      |      | .651 |      |      |
| II_22 |           |      |      |      | .709 |      |
| II_23 |           |      |      |      | .862 |      |
| II_24 |           |      |      |      | .811 |      |
| II_25 |           |      |      |      | .772 |      |
| II_15 |           |      | .453 |      |      | .422 |
| II_6  |           |      |      |      |      | .726 |

Note: Factor cross loadings below 0.4 are not shown. Factor 6 is deleted from further analysis.

**1b. Rotated Component Matrix – “Technostress Inhibitors”**

|       | Component |      |      |
|-------|-----------|------|------|
|       | 1         | 2    | 3    |
| I2_1  | .830      |      |      |
| I2_2  | .831      |      |      |
| I2_3  | .693      |      |      |
| I2_4  | .627      | .416 |      |
| I2_5  | .659      |      |      |
| I2_6  |           | .778 |      |
| I2_7  |           | .796 |      |
| I2_8  |           | .829 |      |
| I2_9  |           | .840 |      |
| I2_10 |           |      | .570 |
| I2_11 |           |      | .779 |
| I2_12 |           |      | .893 |
| I2_13 |           |      | .830 |

Note: Factor cross loadings below 0.4 are not shown.

**Table 2: Testing for the Moderating Effect of (a) “Technostress Inhibitors” on the relationship between “Technostress Creators” and “Job Satisfaction” and (b) sub-factors of “Technostress Inhibitors” on the relationship between sub-factors of “Technostress Creators” and “Job Satisfaction”**

| Model | Independent Variable        | Beta   | t-value- | Significance |
|-------|-----------------------------|--------|----------|--------------|
| 1     | Technostress Creators       | -0.153 | -2.96    | 0.003        |
|       | Technostress Inhibitors     | 0.351  | 8.45     | 0.000        |
|       | Moderator                   | -0.005 | -0.88    | 0.378        |
| 2     | Techno- Overload            | -0.093 | -2.83    | 0.005        |
|       | Technical Support Provision | 0.241  | 6.28     | 0.000        |
|       | Moderator                   | 0.001  | 0.03     | 0.973        |
| 3     | Techno- Insecurity          | -0.099 | -2.67    | 0.008        |
|       | Technical Support Provision | 0.240  | 6.26     | 0.000        |
|       | Moderator                   | 0.002  | 0.05     | 0.961        |
| 4     | Techno- Invasion            | -0.085 | -2.38    | 0.018        |
|       | Technical Support Provision | 0.262  | 6.69     | 0.000        |
|       | Moderator                   | 0.047  | 1.11     | 0.270        |
| 5     | Techno- Uncertainty         | 0.030  | 0.76     | 0.451        |
|       | Technical Support Provision | 0.239  | 6.10     | 0.000        |
|       | Moderator                   | -0.048 | -1.14    | 0.254        |
| 6     | Techno- Complexity          | -0.066 | -1.67    | 0.098        |
|       | Technical Support Provision | 0.242  | 6.26     | 0.000        |
|       | Moderator                   | -0.021 | 0.45     | 0.652        |
| 7     | Techno- Overload            | -0.083 | -2.51    | 0.012        |
|       | Literacy Facilitation       | 0.262  | 7.44     | 0.000        |
|       | Moderator                   | -0.044 | -1.35    | 0.177        |
| 8     | Techno- Insecurity          | -0.110 | -2.99    | 0.003        |
|       | Literacy Facilitation       | 0.265  | 7.66     | 0.000        |
|       | Moderator                   | -0.051 | -1.34    | 0.180        |
| 9     | Techno- Invasion            | -0.083 | -2.34    | 0.020        |
|       | Literacy Facilitation       | 0.269  | 7.75     | 0.000        |
|       | Moderator                   | 0.001  | 0.02     | 0.982        |
| 10    | Techno- Uncertainty         | -0.008 | -0.20    | 0.841        |
|       | Literacy Facilitation       | 0.264  | 7.37     | 0.000        |
|       | Moderator                   | -0.056 | -1.45    | 0.147        |
| 11    | Techno- Complexity          | -0.040 | -0.99    | 0.324        |
|       | Literacy Facilitation       | 0.257  | 7.28     | 0.000        |
|       | Moderator                   | 0.022  | 0.55     | 0.580        |
| 12    | Techno- Overload            | -0.101 | -3.06    | 0.002        |
|       | Involvement Facilitation    | 0.200  | 6.00     | 0.000        |
|       | Moderator                   | -0.007 | -0.22    | 0.825        |
| 13    | Techno- Insecurity          | -0.148 | -3.93    | 0.000        |
|       | Involvement Facilitation    | 0.217  | 6.56     | 0.000        |
|       | Moderator                   | -0.035 | -0.99    | 0.325        |
| 14    | Techno- Invasion            | -0.115 | -3.15    | 0.002        |
|       | Involvement Facilitation    | 0.222  | 6.61     | 0.000        |
|       | Moderator                   | -0.057 | -1.55    | 0.122        |
| 15    | Techno- Uncertainty         | 0.020  | 0.51     | 0.609        |
|       | Involvement Facilitation    | 0.198  | 5.87     | 0.000        |
|       | Moderator                   | -0.021 | -0.58    | 0.564        |
| 16    | Techno- Complexity          | -0.082 | -2.06    | 0.040        |
|       | Involvement Facilitation    | 0.201  | 6.09     | 0.000        |
|       | Moderator                   | 0.051  | 1.32     | 0.188        |
